# Supplementary material for: Dendrimer-mediated delivery of N-acetyl cysteine to microglia in a mouse model of Rett syndrome
Source: PubMed Central journal article supplement (PMC5735803; doi:10.1186/s12974-017-1004-5), 2017-12-19
Supplement: 12974_2017_1004_MOESM1_ESM.pdf [file 12974_2017_1004_MOESM1_ESM.pdf]

| Subscale and score | Criteria                                                     |
|--------------------|--------------------------------------------------------------|
| Mobility           |                                                              |
| 0                  | normal, active                                               |
| 1                  | decreased spontaneous movement                               |
| 2                  | no spontaneous movement, only moves when prodded             |
| 3                  | no movement                                                  |
| Gait               |                                                              |
| 0                  | walks normally                                               |
| 1                  | waddling                                                     |
| 2                  | waddling, walks on toes (paws not flat on ground)            |
| 3                  | waddling, feet displaced outward, paws clenched when walking |
| Tremors            |                                                              |
| 0                  | none                                                         |
| 1                  | Sporadic                                                     |
| 2                  | Intermittent                                                 |
| 3                  | Continuous                                                   |
| Paw Clenching      |                                                              |
| 0                  | none                                                         |
| 1                  | 1-2 paws                                                     |
| 2                  | 3 paws or both fore limbs/hind limbs                         |
| 3                  | all paws                                                     |
| Clench time        |                                                              |
| 0                  | none                                                         |
| 1                  | sporadic                                                     |
| 2                  | intermittent (patterned)                                     |
| 3                  | continuous                                                   |
| Paw wringing       |                                                              |
| 0                  | none                                                         |
| 1                  | some front paw                                               |
| 2                  | some front and back paw                                      |
| 3                  | continuous                                                   |
| Respiration        |                                                              |
| 0                  | regular                                                      |
| 1                  | irregular                                                    |
| 2                  | too fast or too slow                                         |
| 3                  | apnic                                                        |
